# Supplementary material
Source: publisher figshare collection journal article supplement (https://rs.figshare.com/ndownloader/files/11657609)
Supplement: Supplementary file 1 [file 11657609]

**
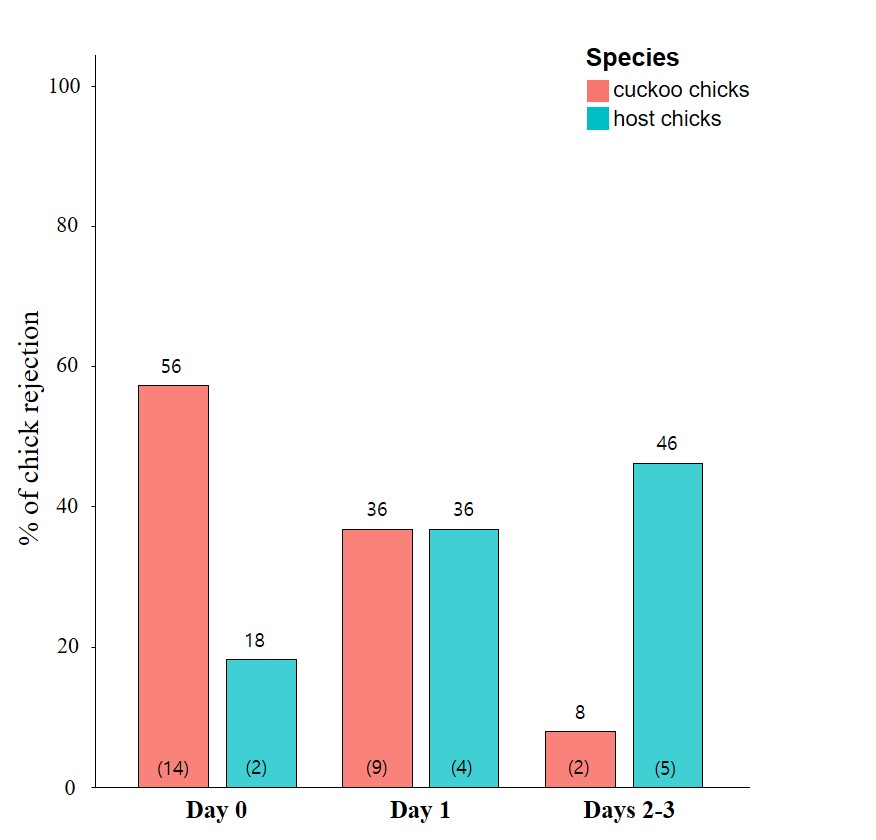
**

**Figure S2.** The percentage of cuckoo chicks and host chicks that were rejected according to the time to ejection (Day 0 = hatching day). Sample sizes are given in parentheses at the base of the bar, and numbers above bars depict the exact percentage.
